# Supplementary material
Source: bioRxiv or medRxiv preprint supplement (https://www.biorxiv.org/highwire/filestream/68236/field_highwire_adjunct_files/0/223883-1.pdf)
Supplement: Supplementary file [file 223883-1.pdf]

## Online Supplementary Materials

Table S6. Characteristics of mutant INSR and patient phenotypes

| Mutation | INSR subunit | Phenotype  | Plasma insulin pmol/L | INSR defect characteristics |                 |                                        |                                            | Cell types used to characterise mutant       |
|----------|--------------|------------|-----------------------|-----------------------------|-----------------|----------------------------------------|--------------------------------------------|----------------------------------------------|
|          |              |            |                       | Cell surface expression     | Insulin binding | Insulin-stimulated autophosphorylation | Internalisation, dissociation, degradation |                                              |
| L62P     | $\alpha$     | TA-IR      | 600 – 3000*(1)        | ✖                           | ↓(1)            | ↓(1)                                   | NA                                         | RBC(1), HEK293(2)                            |
| R118C    | $\alpha$     | TA-IR, RMS | 70 - 3000(3)          | N(3)                        | ↓(3)            | ↓(3)                                   | NA                                         | CHO(3)                                       |
| I119M    | $\alpha$     | TA-IR, RMS | 2000 – 20000*(4)      | N(4)                        | N(4)            | N(4)                                   | Dissociation ↓(4)                          | EBVL(4), CHO(4)                              |
| P193L    | $\alpha$     | RMS        | 1000 – 2000*(5)       | ↓(6)                        | ↓(5)            | NA                                     | NA                                         | EBVL(5), Rat-1(6)                            |
| F248C    | $\alpha$     | DS         | 7000                  | ♦                           | ♦               | ♦                                      | ♦                                          | ♦                                            |
| R252C    | $\alpha$     | TA-IR      | NR                    | N(7)                        | ↓(7)            | N(7)                                   | Internalisation ↓(7)                       | CHO(7)                                       |
| S323L    | $\alpha$     | DS, RMS    | 2000 – 8000(8,9)      | N(8, 10)                    | ↓(8, 10, 11)    | ↓(8, 10, 11)                           | NA                                         | PBMC(8), NIH-3T3(8, 10), CHO(11)             |
| F382V    | $\alpha$     | TA-IR      | NR                    | ↓(12)                       | N(12, 13)       | ↓(13)                                  | NA                                         | NIH-3T3(12, 13)                              |
| K460E    | $\alpha$     | DS, RMS    | 1000 – 70000(14, 15)  | N(15)                       | ↑(16)           | N/↑(14)                                | Int. ↑(14), diss. ↓(17), deg. ↑(14)        | EBVL(16, 17), PBMC(15), PDF(15), NIH-3T3(14) |
| D707A    | $\alpha$     | DS         | 2000 – 3000*(18)      | N(18)                       | ↓(18)           | ✖(18)                                  | Internalisation ↓(18)                      | PDF(18), CHO(18)                             |
| P1178L   | $\beta$      | TA-IR      | 2000 - >4000(9)       | N(19, 20)                   | N(19, 20)       | ✖(19, 20)                              | NA                                         | CHO(19, 20)                                  |

Previously published characteristics of naturally occurring INSR mutations used in the current study. Mutations are numbered as per the mature INSR B isoform (exon 11+). TA-IR, Type-A Insulin Resistance; RMS, Rabson Mendenhall Syndrome; DS, Donohue Syndrome; \*, reported fasting insulin levels; NR, not reported; ✖, absent; N, normal; ↓, decreased compared to WT receptor; ↑, increased compared to WT receptor; ♦, not previously described; NA, not assessed; RBC, red blood cells; EBVL, Epstein Barr virus transformed lymphoblasts; PBMC, peripheral blood mononucleocytes; CHO, Chinese Hamster Ovary; Rat-1, Rat-1 fibroblasts; NIH-3T3, NIH-3T3 murine fibroblasts; HEK293, human embryonic kidney 293.

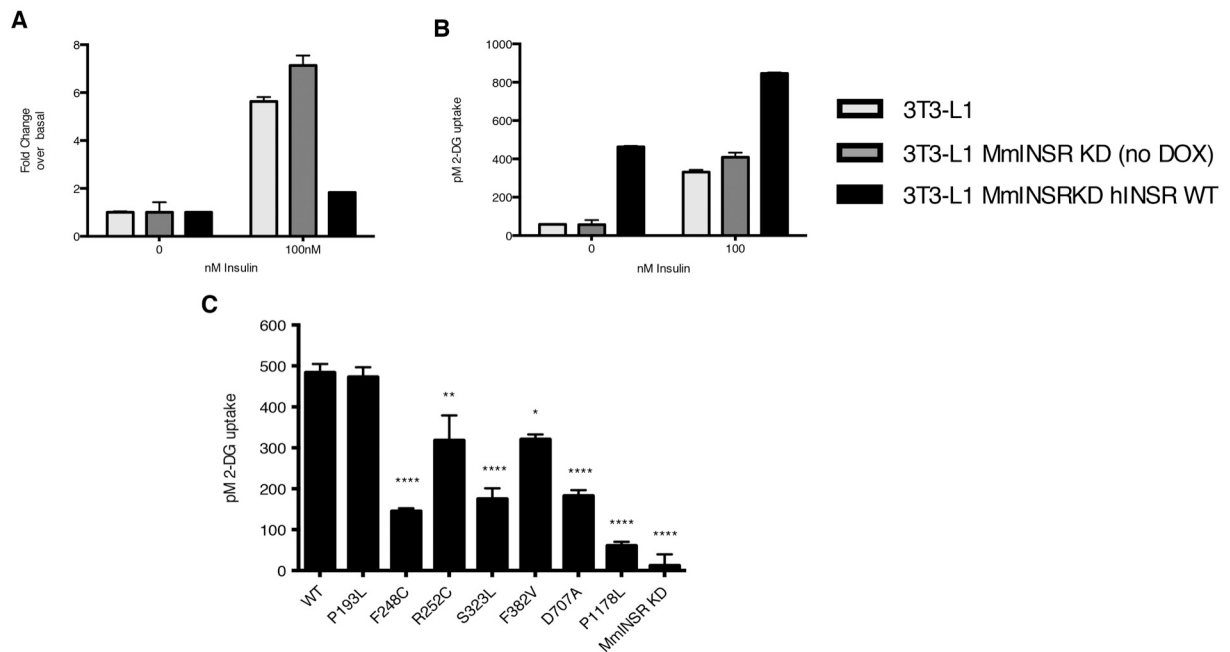

**Fig S1. Basal glucose uptake differs between each of the 3T3-L1 MmINSR KD cell lines overexpressing mutant INSR.** (A & B) Insulin stimulated glucose uptake in parent 3T3-L1 cells that were used to generate 3T3-L1 MmINSR KD cells, 3T3-L1 MmINSR KD cells cultured without DOX induction of knockdown of endogenous mouse INSR, and 3T3-L1 MmINSR KD hINSR WT cells cultured in the presence of DOX to induce knockdown of endogenous mouse INSR and expression of hINSR WT. (C) 3T3-L1 MmINSR KD hINSR (mutant as indicated) adipocytes were grown in the presence of 1 µg/ml DOX for 10 days prior to overnight serum-starvation on day 15 of differentiation. Cells were then glucose starved for 30 minutes prior to the addition of 2-Deoxy-D-glucose for 5 minutes. Cells were then washed, lysed and assessed for 2-Deoxy-D-glucose uptake. Data is the mean  $\pm$  SEM from three independent experiments. The statistical significance between non-stimulated basal 2-Deoxy-D-glucose uptake of each of the mutant receptor expressing cell lines was determined by one-way ANOVA with Tukey's multiple comparison test. Statistical significance between WT expressing cells and mutant INSR expressing cells denoted by \*  $p < 0.05$ ; \*\*  $p < 0.01$ , and \*\*\*\*  $p < 0.0001$ .

**Table S1: Composition of cell culture medium**

| <b>Cell Line</b>     | <b>Media Name</b>       | <b>Base Medium</b> | <b>Supplements</b>                                                                                                             |
|----------------------|-------------------------|--------------------|--------------------------------------------------------------------------------------------------------------------------------|
| CHO FlpIN            | CHO Media               | F12                | 10% (v/v) foetal calf serum (FCS), 50 units/ml penicillin, 50units/ml streptomycin, 4mM L-glutamine                            |
| 3T3-L1 Preadipocytes | Preadipocyte Media      | DMEM               | 10% (v/v) newborn calf serum (NCS), 50 units/ml penicillin, 50units/ml streptomycin, 4mM L-glutamine                           |
| 3T3-L1 Adipocytes    | Adipocyte Media         | DMEM               | 10% (v/v) TET-approved FCS (Clontech), 50 units/ml penicillin, 50units/ml streptomycin, 4mM L-glutamine                        |
| 3T3-L1 Preadipocytes | Differentiation media 1 | DMEM               | Same as Adipocyte media with the addition of 1µM insulin, 200nM rosiglitazone, 500µM methylisobutylxanthine, 1µM dexamethasone |
| 3T3-L1 Adipocytes    | Differentiation media 2 | DMEM               | Same as Adipocyte media with the addition of 1µM insulin and 200nM rosiglitazone                                               |

**Table S2: Vectors and sub-cloning steps used in generation of CHO FlpIn hINSR cells**

| <b>Vector</b>     | <b>Source/Reference</b> | <b>Use</b>                                                                    |
|-------------------|-------------------------|-------------------------------------------------------------------------------|
| pCR_Blunt_II_TOPO | Invitrogen              | TOPO clone hINSR PCR product from pDNR-Dual                                   |
| pCDNA/5/FRT/TO    | Invitrogen              | hINSR expression vector<br>ApaI/HindIII hINSR fragment from pCR_Blunt_II_TOPO |
| pOG44             | Invitrogen              | Expression of Flp recombinase                                                 |

**Table S3: Target sequences, primers, vectors and sub-cloning steps used in the generation of lentiviruses**

| Sequence/vector                          | Source/Reference                                                         | Use                                                                                                                                                                                                 |
|------------------------------------------|--------------------------------------------------------------------------|-----------------------------------------------------------------------------------------------------------------------------------------------------------------------------------------------------|
| CGGATCCCATATCAGTTTCTAA                   | Open Biosystems                                                          | Target sequence for murine INSR miR-shRNA                                                                                                                                                           |
| AAGACCAGACCCGAAGATTTC                    | Seibler <i>et al</i> (2007)<br><i>Nucleic Acids Res.</i> <b>35</b> , e54 | Target sequence for murine INSR miR-shRNA                                                                                                                                                           |
| pEN-TGmiRC3                              | Shin <i>et al</i> (2006) PNAS<br><b>103</b> , 13759–13764 (2006)         | miR-shRNAs concatenated into this entry vector by SpeI, XbaI, PstI directional cloning as described by Shin <i>et al</i>                                                                            |
| pSLIK-Hygro                              | Shin <i>et al</i> (2006) PNAS<br><b>103</b> , 13759–13764 (2006)         | miR-shRNAs gateway cloned into this lentiviral expression vector by gateway cloning with LR clonase                                                                                                 |
| pMDLg/pRRE, pRSVREV, pVSV-G              | Shin <i>et al</i> (2006) PNAS<br><b>103</b> , 13759–13764 (2006)         | Third-generation lentivirus packaging and pseudotyping plasmids                                                                                                                                     |
| pEN_Tmcs                                 | Shin <i>et al</i> (2006) PNAS<br><b>103</b> , 13759–13764 (2006)         | Entry vector                                                                                                                                                                                        |
| pEN_TmcsMCS2                             | N/A                                                                      | Oligonucleotide linker encoding NotI-BamHI-ScaI-SphI-HindIII-NcoI-PmeI-KpnI-ApaI-XhoI was cloned into pEN_Tmcs between NotI and XhoI sites. PCR amplified hINSR cloned into SpeI and HindIII sites. |
| GGGGACTACTTCCACCATGGCCACCG               | Sigma-Aldrich                                                            | Fwd 5'-3' primer to amplify myc-tagged hINSR mutants from pCDNA5/FRT/TO                                                                                                                             |
| GCATGCAAGCTTCTACAGATCCTCTTC<br>TGAGATGAG | Sigma-Aldrich                                                            | Rev 5'-3' primer to amplify myc-tagged hINSR mutants from pCDNA5/FRT/TO                                                                                                                             |
| pSLIK-NEO                                | Shin <i>et al</i> (2006) PNAS<br><b>103</b> , 13759–13764 (2006)         | Mutant hINSR cloned into this expression vector by gateway cloning from pEN_TmcsMCS2                                                                                                                |

**Table S4: Buffer Composition**

| <b>Buffer Name</b> | <b>Composition</b>                                                                                                                                                                                                      |
|--------------------|-------------------------------------------------------------------------------------------------------------------------------------------------------------------------------------------------------------------------|
| FACS Buffer        | PBS, 0.5% BSA, 0.1% sodium azide                                                                                                                                                                                        |
| Lysis Buffer       | 20mM HEPES, 150mM NaCl, 1.2mM MgCl <sub>2</sub> , 1mM EGTA, 1mM PMSF, 1mM Na <sub>3</sub> VO <sub>4</sub> , 10% (v/v) glycerol, 1% (v/v) Triton-X-100, complete-EDTA-free protease inhibitors (Roche), phosSTOP (Roche) |
| KRPH Buffer        | 120mM NaCl, 5mM KCl, 1.2mM MgCl <sub>2</sub> , 10mM NaHCO <sub>3</sub> , 1.3mM CaCl <sub>2</sub> , 1.2mM KH <sub>2</sub> PO <sub>4</sub> , 20mM HEPES                                                                   |

**Table S5: Antibodies used during Western blotting**

| <b>Target</b>                            | <b>Dilution</b> | <b>Catalogue #</b> | <b>Manufacturer</b>        |
|------------------------------------------|-----------------|--------------------|----------------------------|
| INSR $\beta$                             | 1:200           | SC-711             | Santa Cruz Biotechnology   |
| INSR $\beta$                             | 1:1000          | 3025               | Cell Signalling Technology |
| Phospho-INSR $\beta$ (Tyr1162/Tyr1163)   | 1:1000          | 44804G             | Life Technologies          |
| Myc-tag                                  | 1:1000          | 05-724             | Millipore                  |
| Calnexin                                 | 1:1000          | Ab22595            | Abcam                      |
| Phospho-AKT (Thr308)                     | 1:1000          | 2965               | Cell Signalling Technology |
| Phospho-AKT (Ser473)                     | 1:1000          | 4060               | Cell Signalling Technology |
| AKT                                      | 1:1000          | 2920               | Cell Signalling Technology |
| Phospho-ERK1/2 (Tyr204/Tyr187)           | 1:1000          | 5726               | Cell Signalling Technology |
| ERK1/2                                   | 1:1000          | 4695               | Cell Signalling Technology |
| Phospho-GSK3 $\alpha/\beta$ (Ser21/Ser9) | 1:1000          | 9331               | Cell Signalling Technology |
| GSK3 $\alpha/\beta$                      | 1:1000          | 5676               | Cell Signalling Technology |
| Phospho-p70S6K (Thr389)                  | 1:1000          | 9205               | Cell Signalling Technology |
| p70S6K                                   | 1:1000          | 2708               | Cell Signalling Technology |
| Phospho-AS160                            | 1:1000          | 4288               | Cell Signalling Technology |
| Anti-mouse IgG HRP conjugated            | 1:10,000        | 7076               | Cell Signalling Technology |
| Anti-rabbit IgG HRP-conjugated           | 1:5,000         | 7074               | Cell Signalling Technology |
